# Supplementary material
Source: Springer Nature journal article supplement (https://www.springermedizin.de/resource/supplementary/12885_2014_4910_MOESM1_ESM.pdf/9467706)

**A**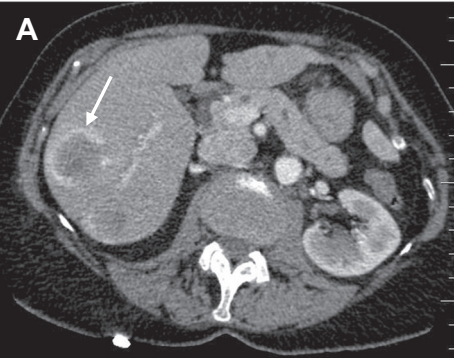**B**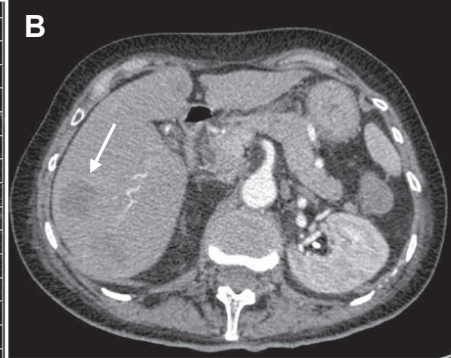

Supplement: MOESM1 [file 9467706]
